# Supplementary material for: Real-world assessment and treatment of locally advanced basal cell carcinoma: Findings from the RegiSONIC disease registry
Source: PLOS journal article supplement (doi:10.1371/journal.pone.0262151), 2022-01-14

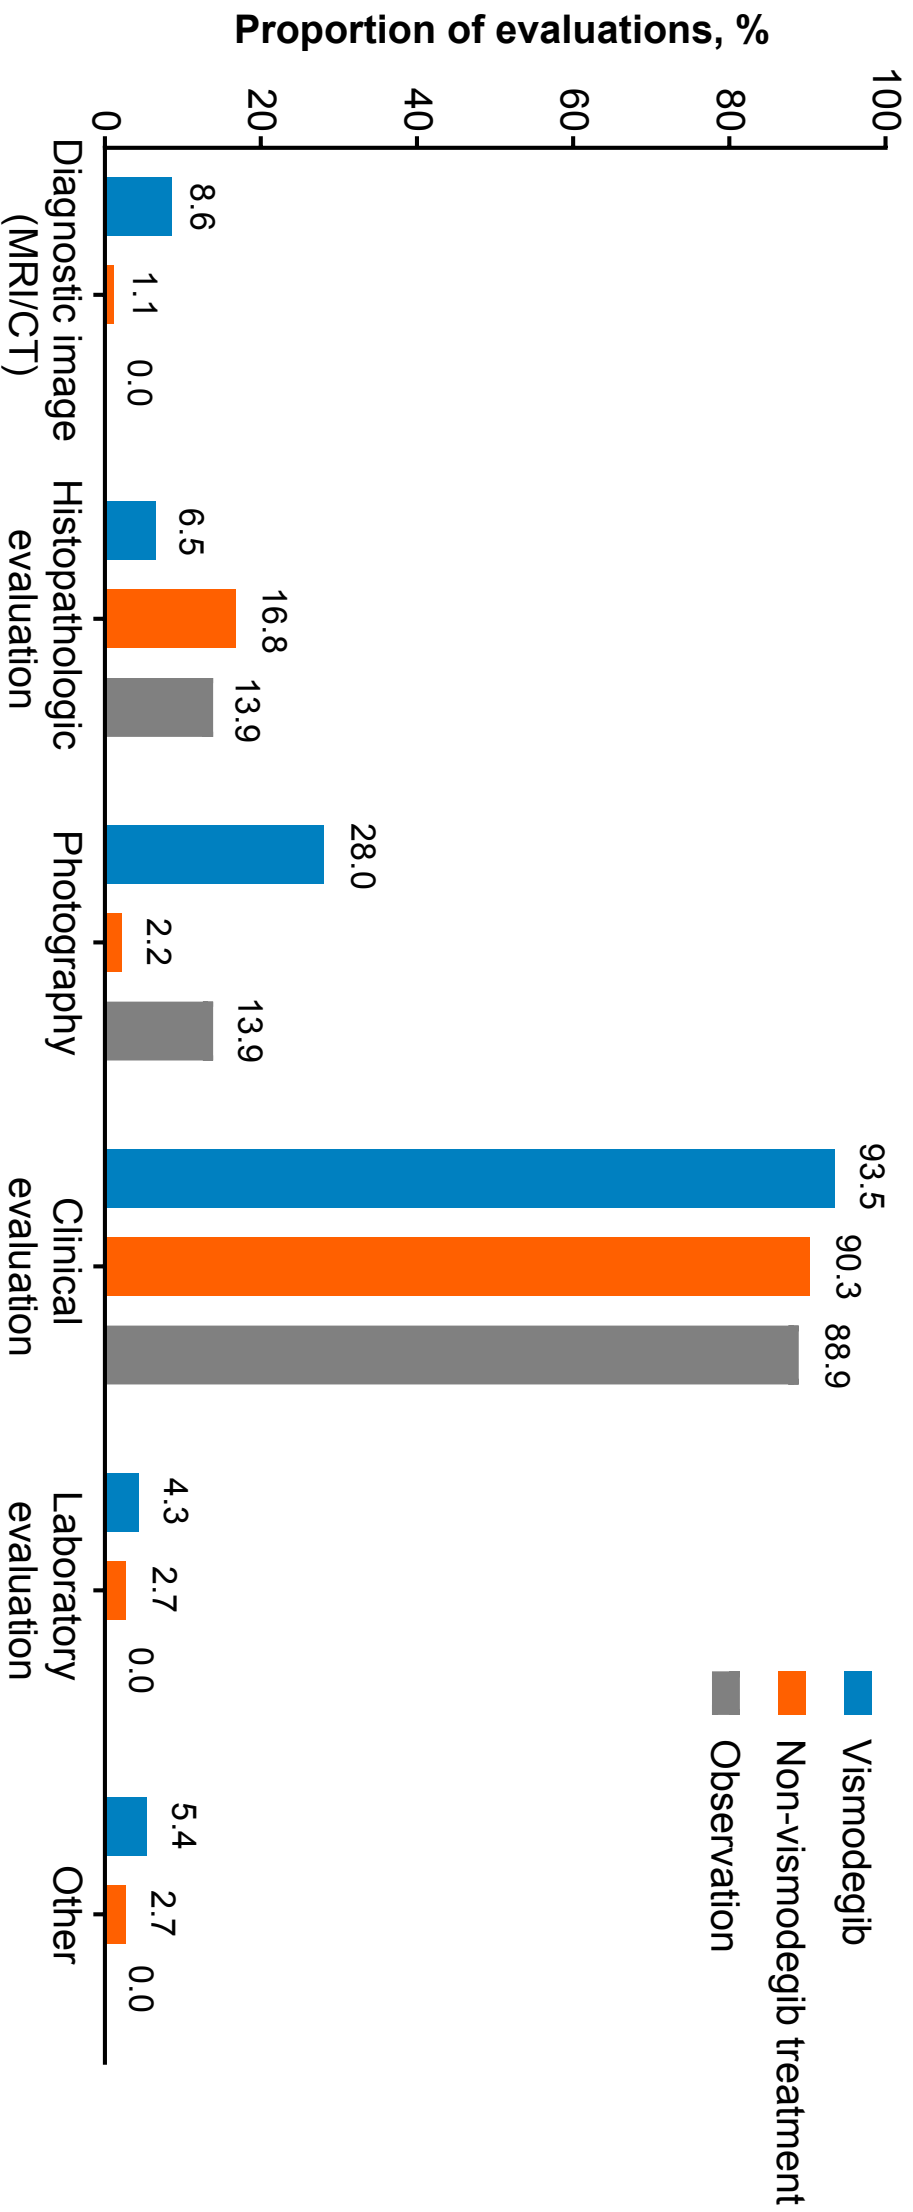

Supplement: S1 (10.1371/journal.pone.0262151.s001) [file journal.pone.0262151.s001]
